# Supplementary material for: Metal–organic framework based drug delivery systems as smart carriers for release of poorly soluble drugs hydrochlorothiazide and dapsone
Source: Royal Society of Chemistry journal article supplement (doi:10.1039/d3dt01301d), 2023-01-01
Supplement: d3dt01301d1.pdf [file d3dt01301d1.pdf]

## **Metal-organic framework based drug delivery systems as smart carriers for release of poorly soluble drugs hydrochlorothiazide and dapsone**

Preety Yadav,<sup>a</sup> Priya Bhardwaj,<sup>b</sup> Mulaka Maruthi,<sup>b</sup> Anindita Chakraborty\*<sup>a</sup> and Prakash Kanoo\*<sup>a</sup>

*<sup>a</sup>Department of Chemistry, School of Basic Sciences, Central University of Haryana, Jant-Pali, Mahendergarh 123031, Haryana, India*

*<sup>b</sup>Department of Biochemistry, School of Interdisciplinary and Applied Sciences, Central University of Haryana, Jant-Pali, Mahendergarh 123031, Haryana, India*

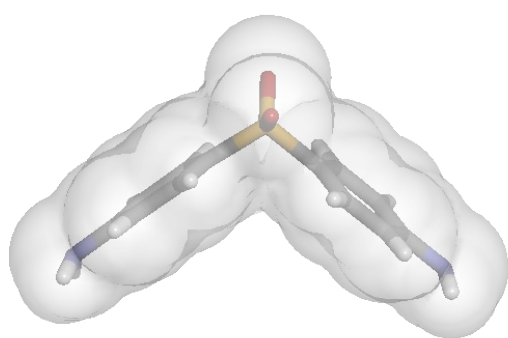

Dapsone

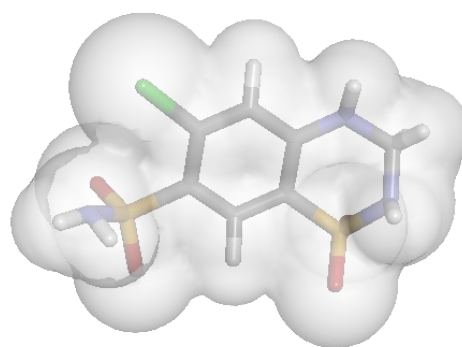

Hydrochlorothiazide

**Fig. S1** The structure of Dapsone and Hydrochlorothiazide after adding the van der Waals radii. The molecular size of DAP and HCT is estimated to be approximately 12.3 x 6.4 Å and 11.2 x 7.5 Å, respectively, which enables the facile encapsulation of the drugs in the MOF.<sup>1,2</sup>

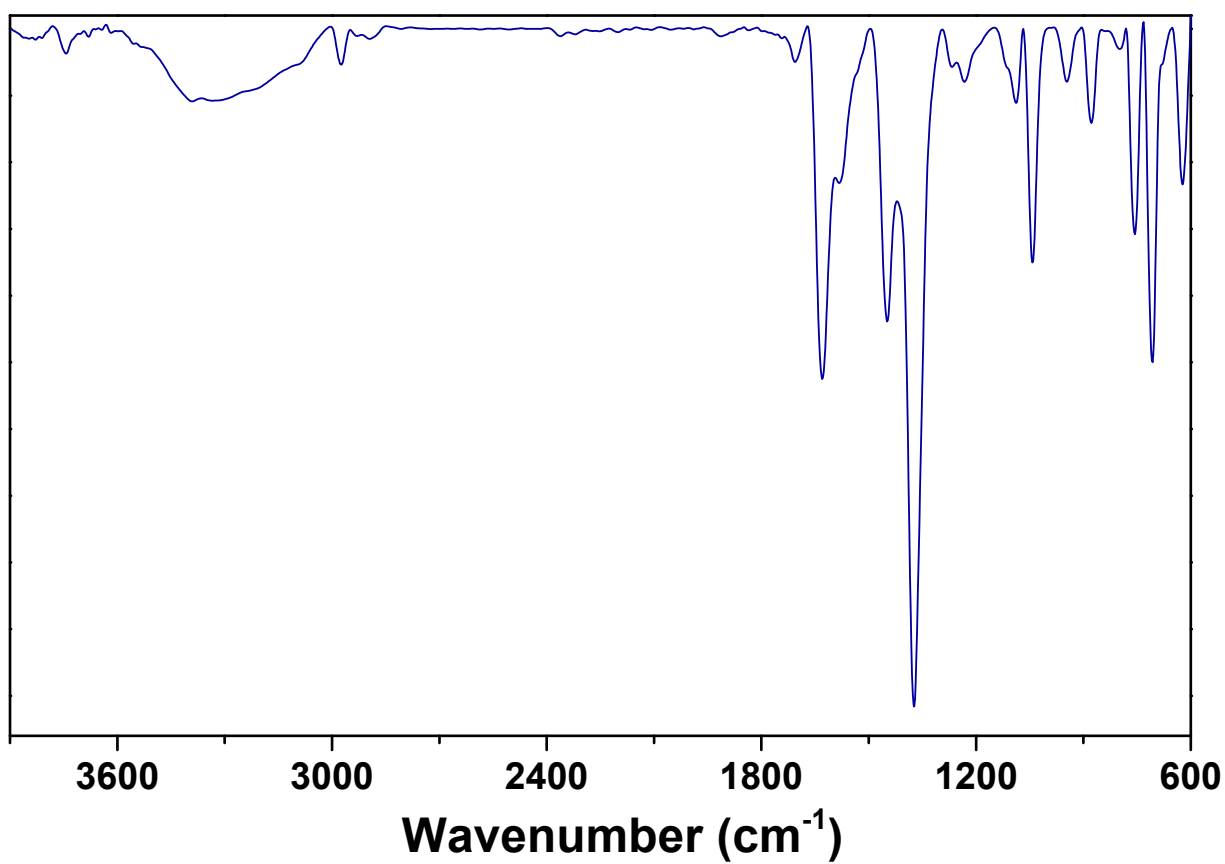

**Fig. S2** FTIR spectrum of MIL-100(Fe).

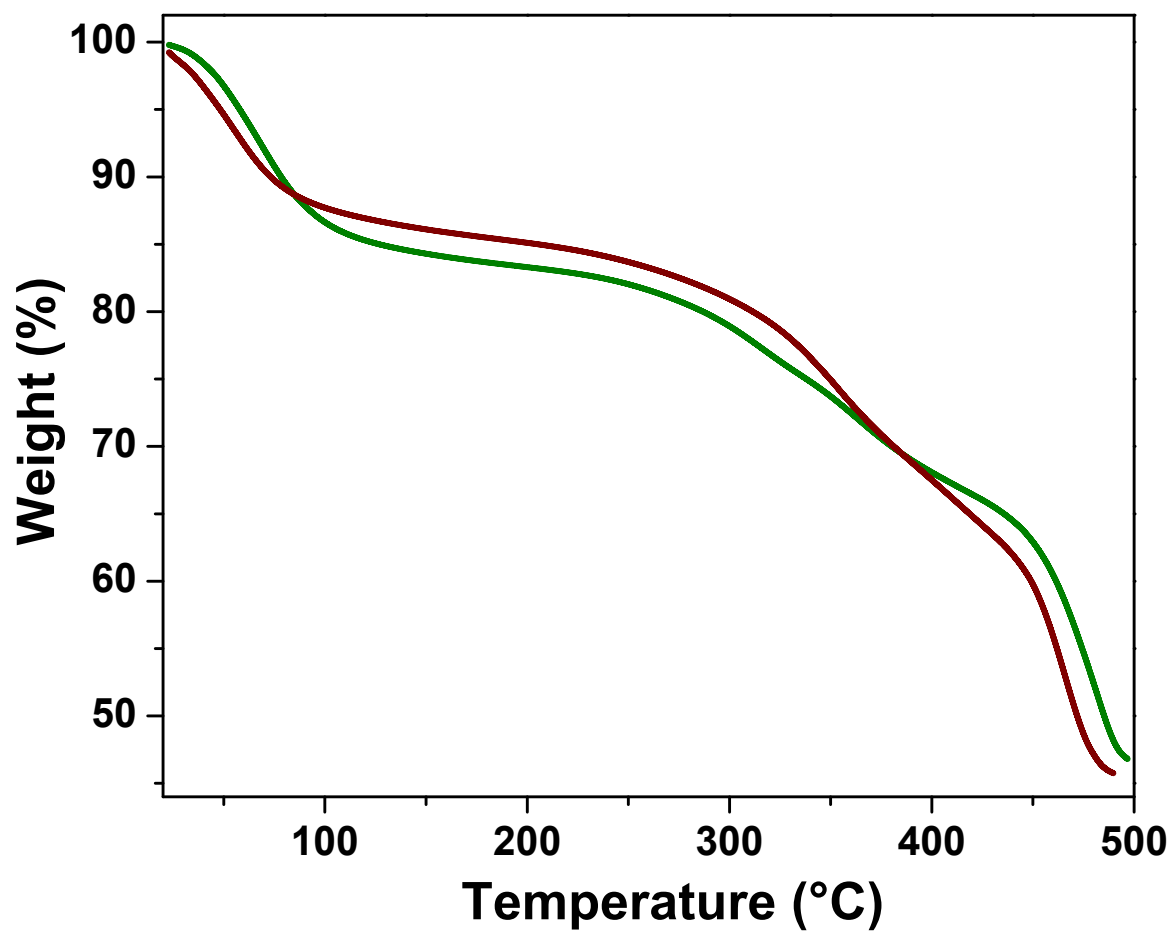

Fig. S3 TGA plot of MIL-100(Fe) (olive) and HCT@MIL-100(Fe) (wine).

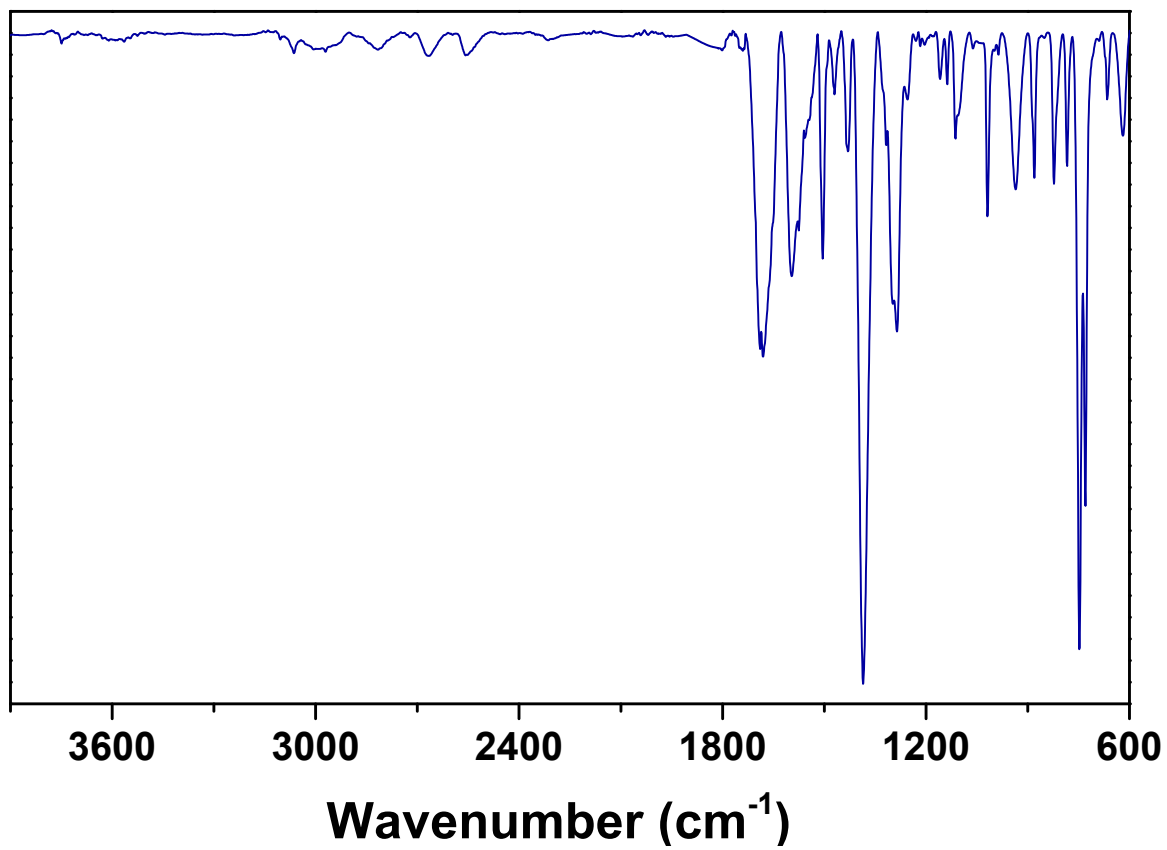

**Fig. S4** FTIR spectrum of MIL-53(Fe).

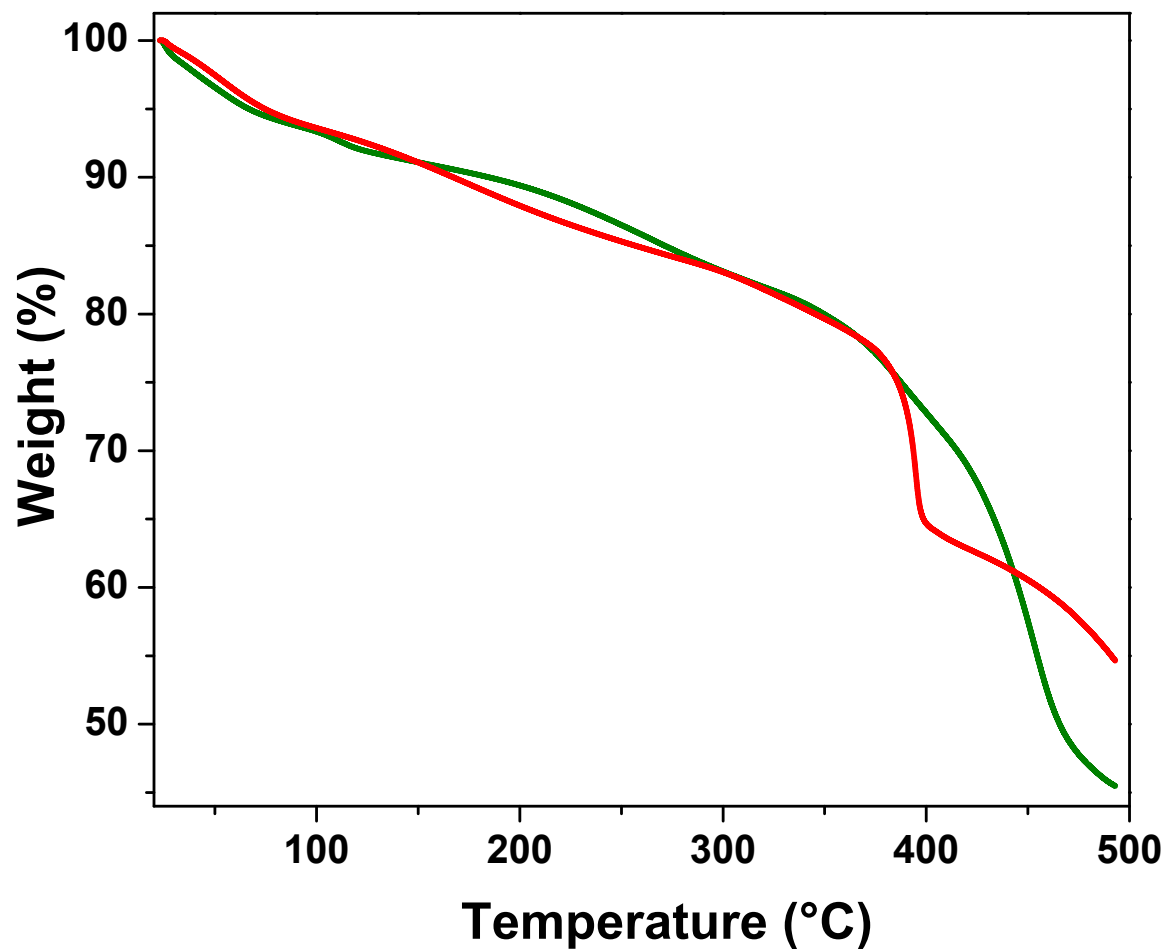

Fig. S5 TGA plot of MIL-53(Fe) (green) and DAP@MIL-53(Fe) (red).

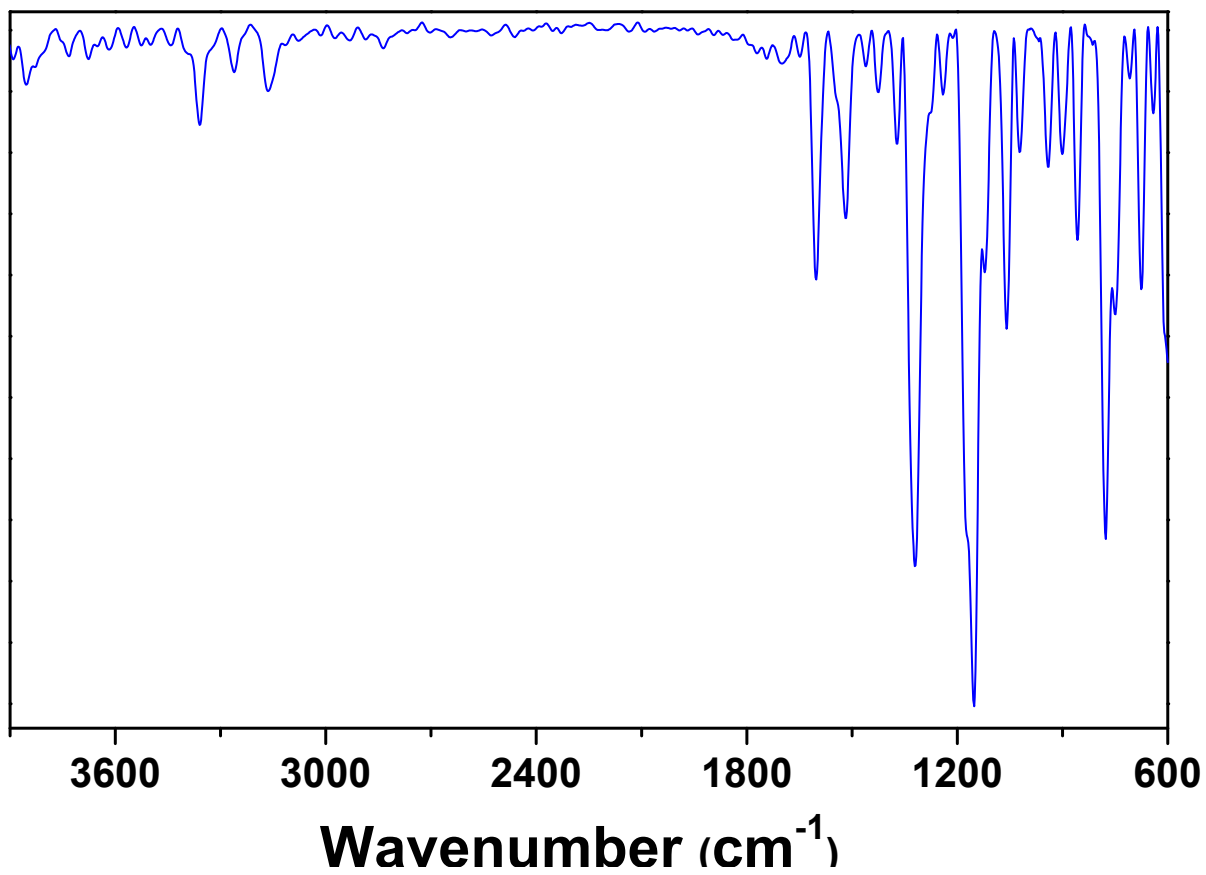

Fig. S6 FTIR spectrum of Hydrochlorothiazide (HCT).

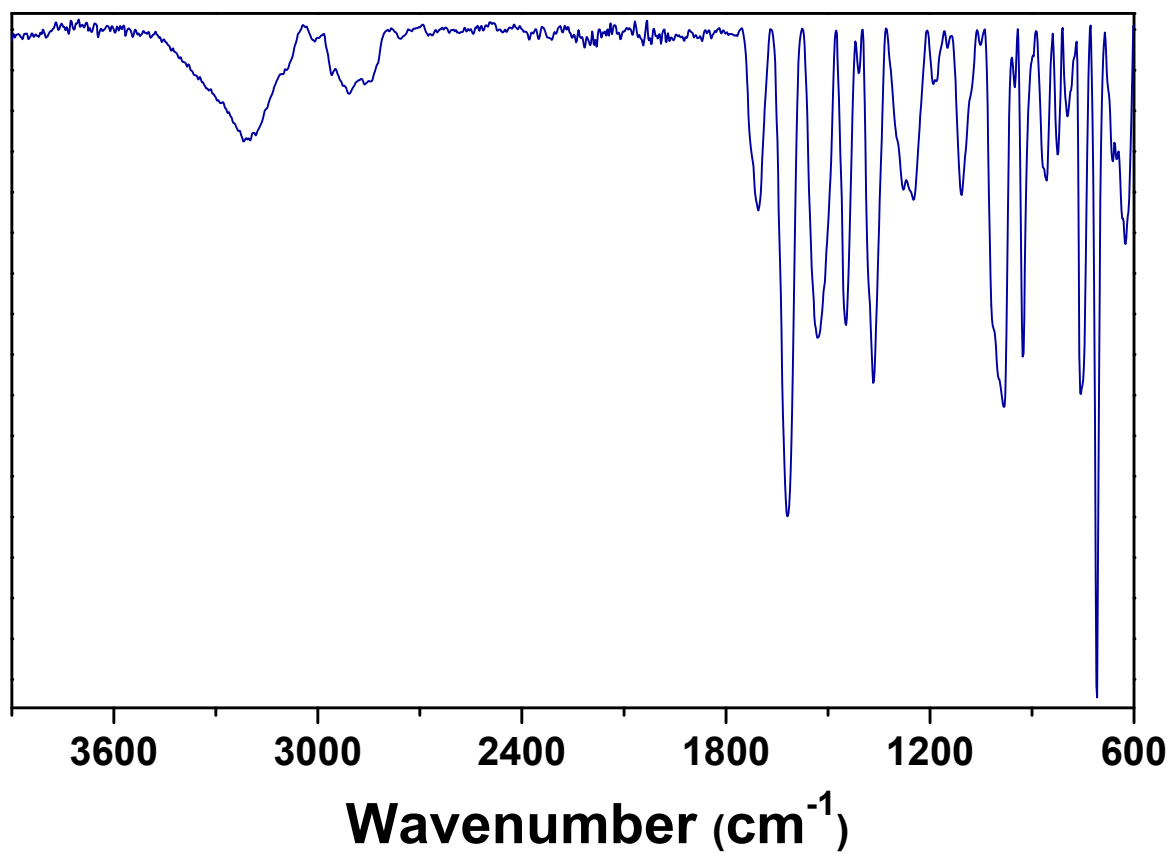

**Fig. S7** FTIR spectrum of HCT@MIL-100(Fe).

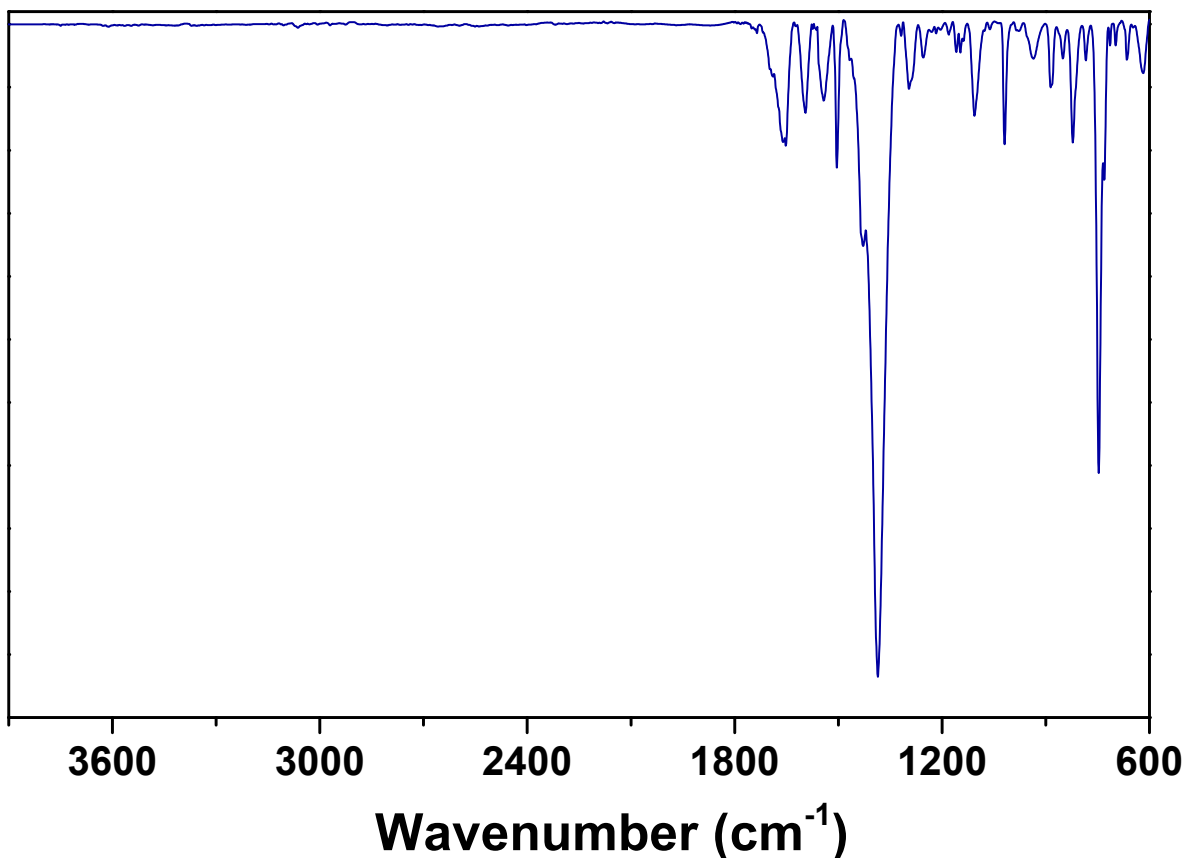

Fig. S8 FTIR spectrum of DAP@MIL-53(Fe).



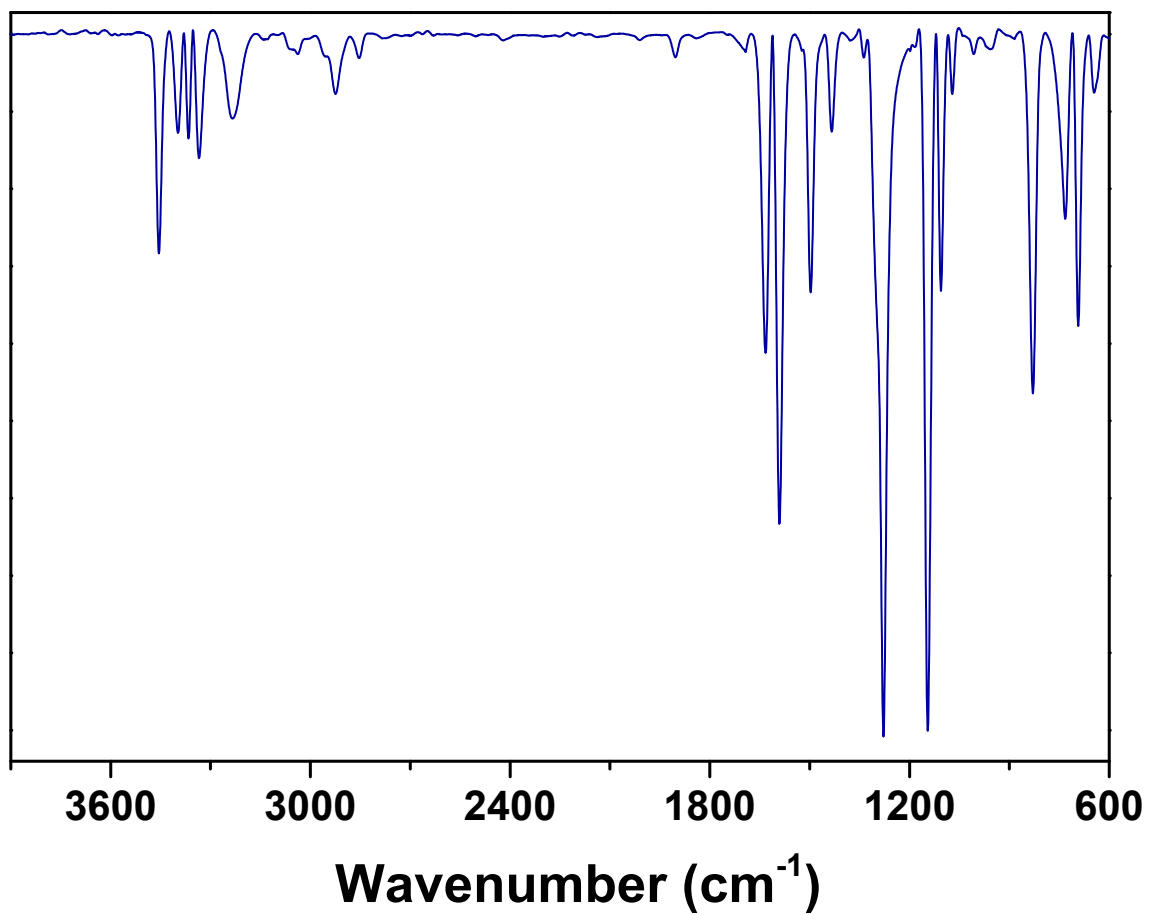

Fig. S9 FTIR spectrum of Dapsone (DAP).

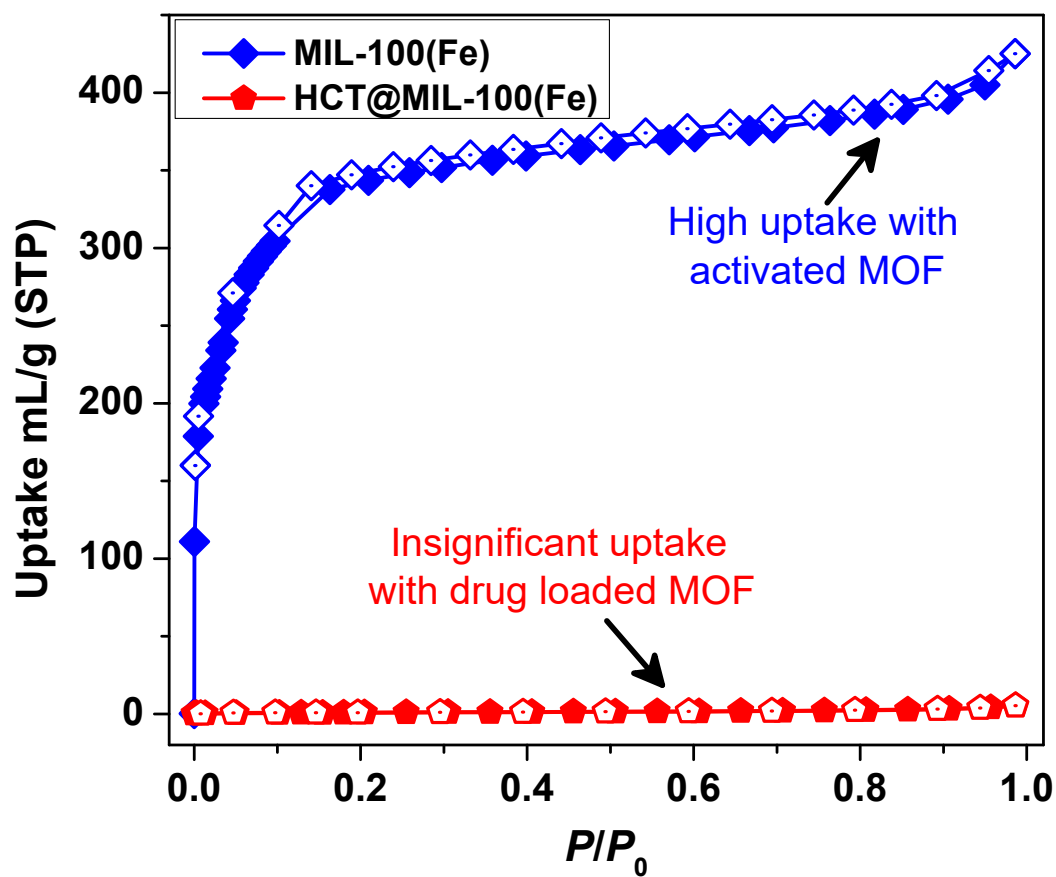

**Fig. S10** Nitrogen adsorption isotherms measured at 77 K for MIL-100(Fe) (blue) and HCT@MIL-100(Fe) (red). Adsorption curve is represented with closed symbols and desorption by open symbols.  $P_0$  is the saturated vapor pressure of nitrogen at the measurement temperatures.

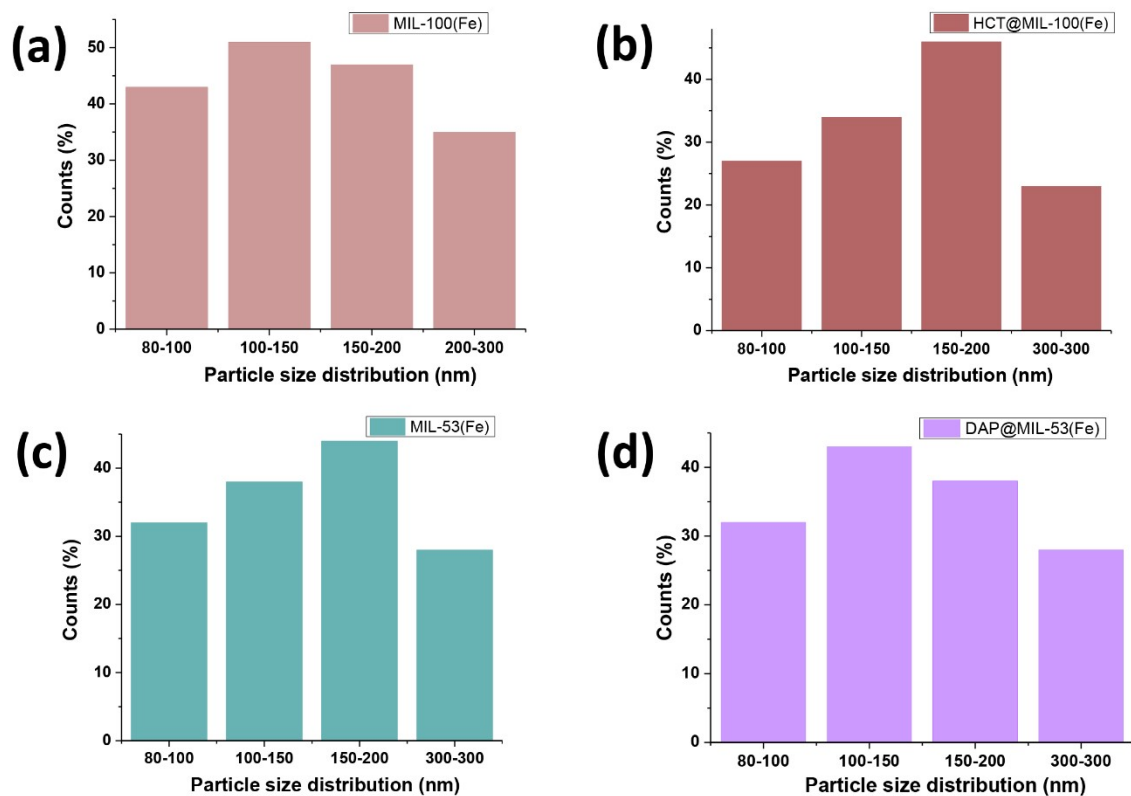

**Fig. S11** Histogram of particle size distribution of (a) MIL-100(Fe), (b) HCT@MIL-100(Fe), (c) MIL-53(Fe), (d) DAP@MIL-53(Fe).

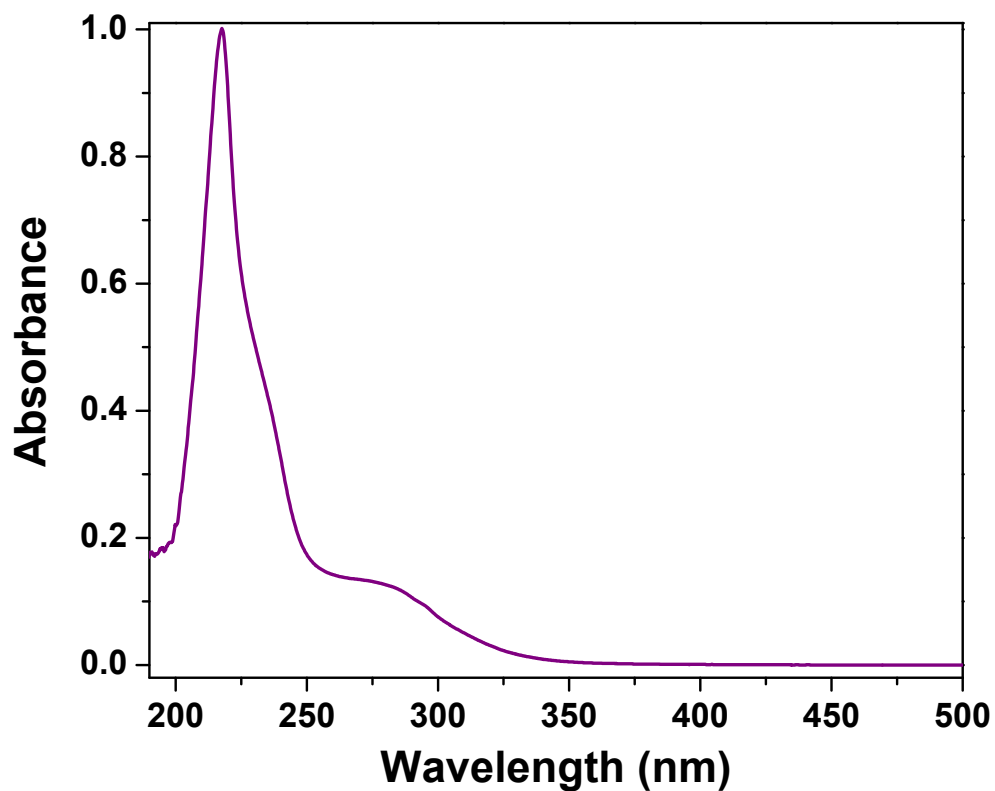

**Fig. S12** UV-Vis absorption plot of HCT@MIL-100(Fe) showing the maximum HCT loaded in MIL-100(Fe).

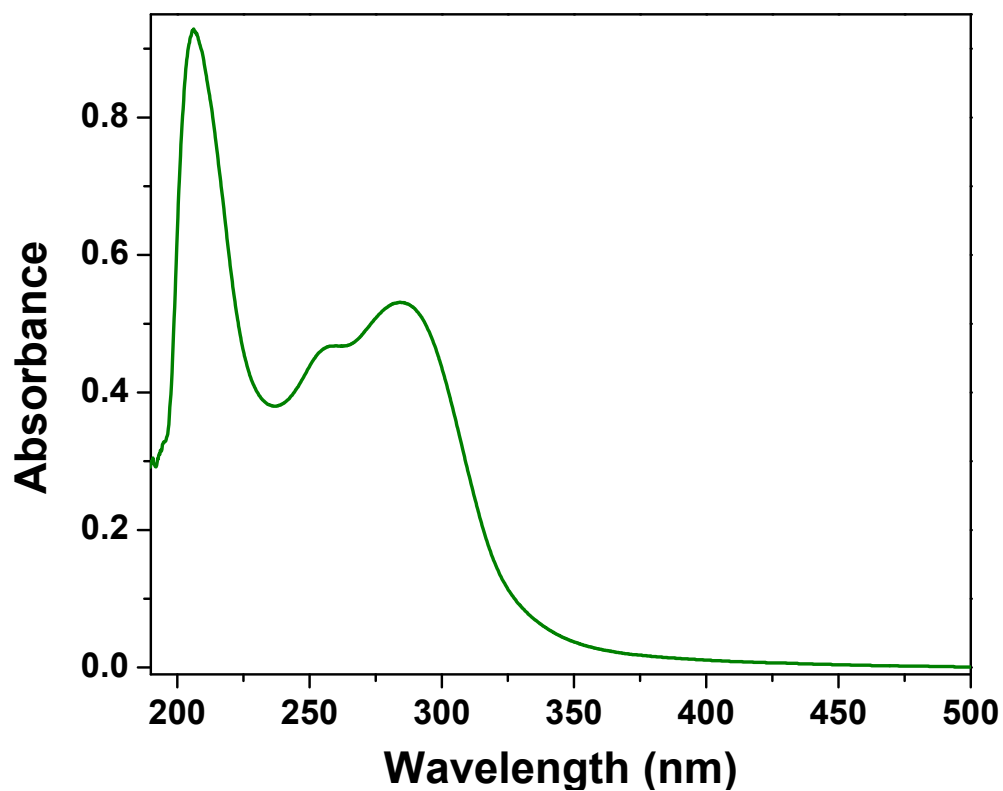

**Fig. S13** UV-Vis absorption plot of DAP@MIL-53(Fe) showing the maximum DAP loaded in MIL-53(Fe).

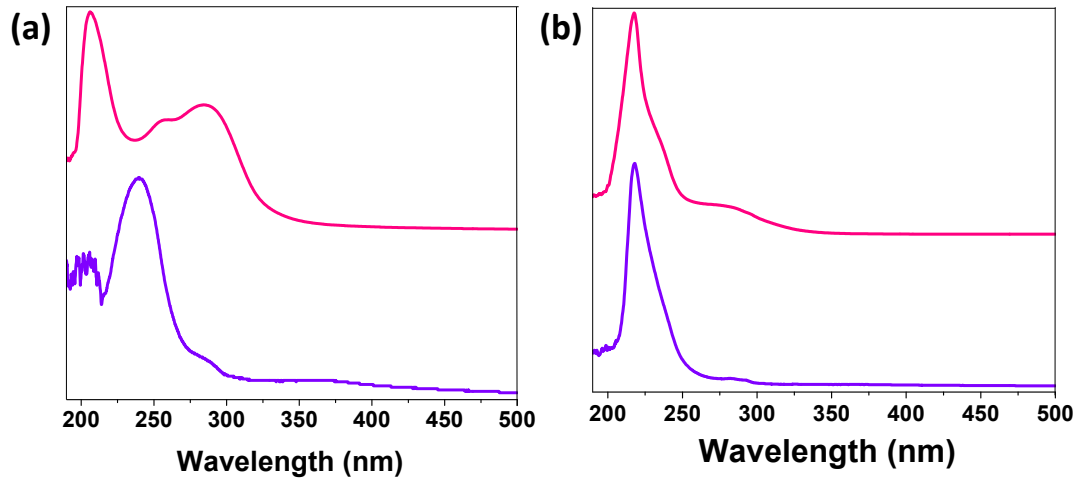

**Fig. S14** UV-vis absorbance spectra of (a) 1,4-benzenedicarboxylic acid (purple), DAP@MIL-53(Fe) (pink), and (b) 1,3,5-benzenetricarboxylic acid (purple), HCT@MIL-100(Fe) (pink).

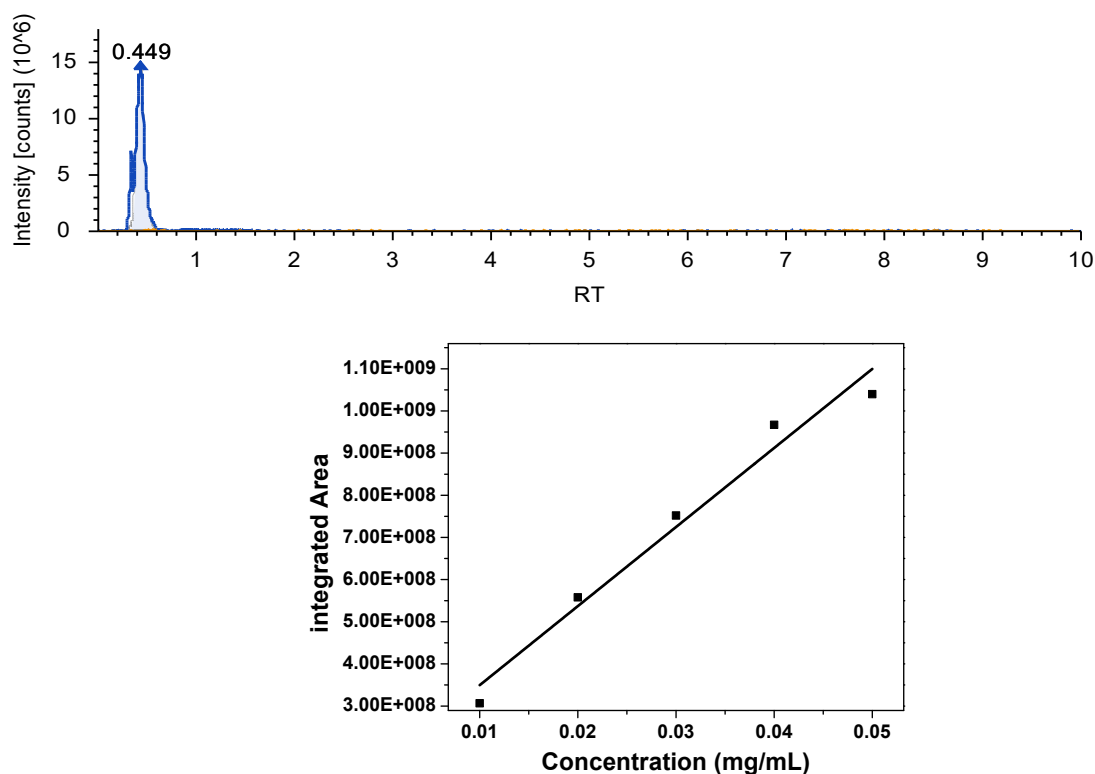

**Fig. S15** Calibration curve and chromatograms by LC-MS of hydrochlorothiazide.

The analyte is determined using a thermoscientific Q Exactive Plus and UHPLC+ focused instrument. C-18 reverse-phase column (1.7  $\mu\text{m}$ , 2.1 x 50 mm) was used. The mobile phase consisted of 50% solution (v/v) of acetonitrile (ACN) and H<sub>2</sub>O. The injection volume was set at 1 ppm with a flow rate of 0.3 mL min<sup>-1</sup> and the column temperature was fixed at 37 °C. Several ACN solution of hydrochlorothiazide were taken as standard. The standard calibration curve showed a decent correlation coefficient  $\geq 0.986$ . The chromatogram of standard solutions showed a retention time of 0.449 min. Upon calculation it has shown that 236 mg (23.6 %) of hydrochlorothiazide has been encapsulated per gram of MIL-100(Fe) which is very much similar to the results obtained by UV-vis spectroscopy. In case of DAP encapsulated MOF, there is no peak at 286 nm in spectra of terephthalic acid, therefore we concluded that BDC does not interfere with the quantification of dapson e encapsulated in MIL-53(Fe).

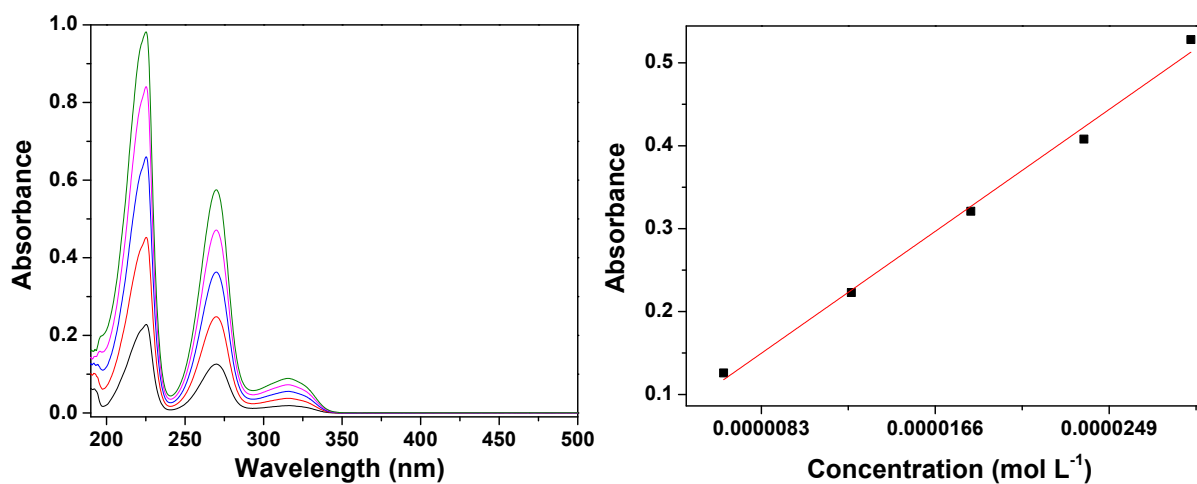

**Fig. S16** UV-Vis absorption plot and calibration curve for epsilon calculation of hydrochlorothiazide.

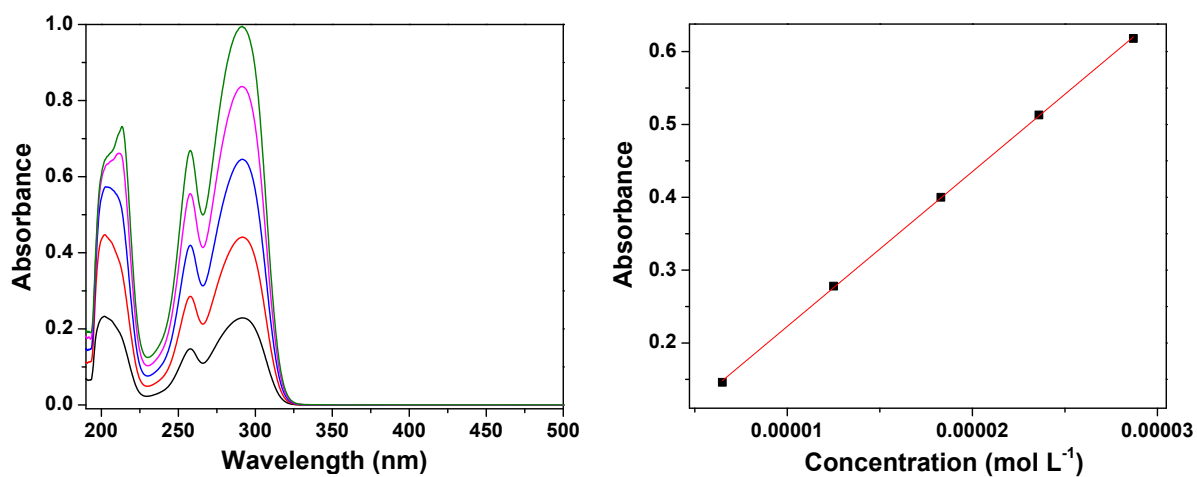

**Fig. S17** UV-Vis absorption plot and calibration curve for epsilon calculation of dapsone.

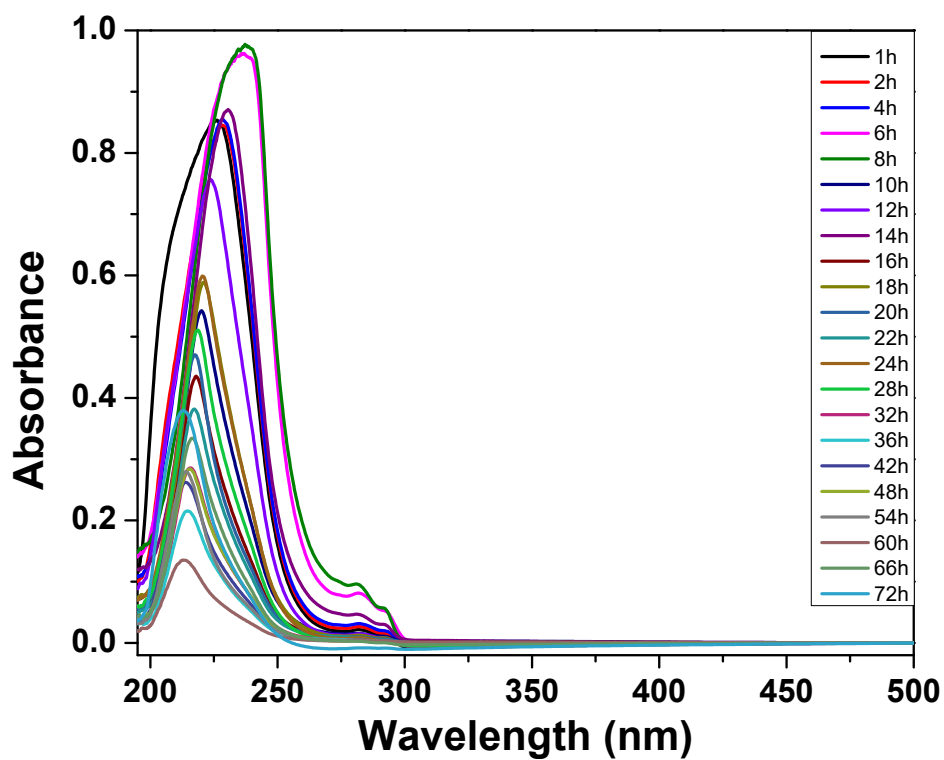

**Fig. S18** UV-Vis absorbance plot of HCT release from HCT@MIL-100(Fe) for a time period of 72 hours.

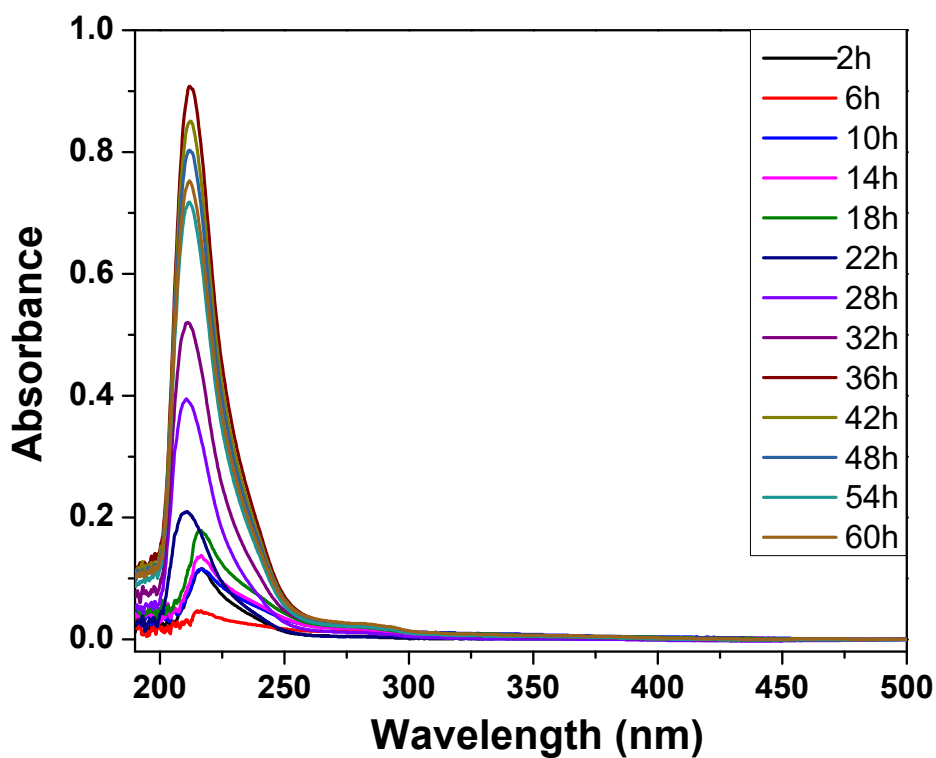

**Fig. S19** UV-vis spectra of MIL-100(Fe) release in phosphate buffer of pH 7.4.

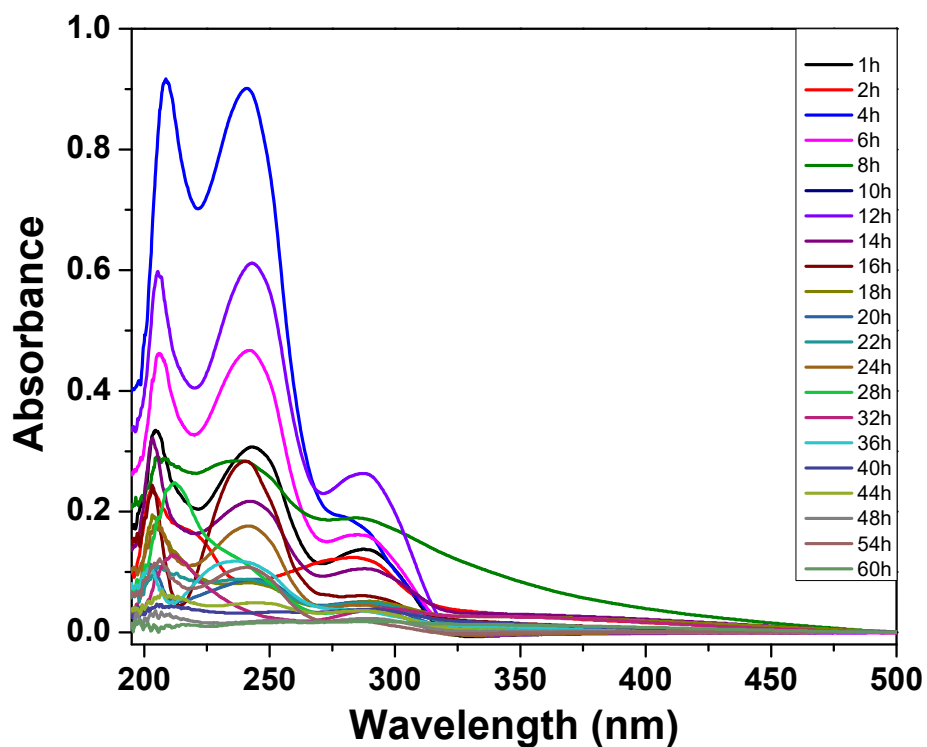

Fig. S20 UV-Vis absorbance plot of DAP release from DAP@MIL-53(Fe) for a time period of 72 hours.

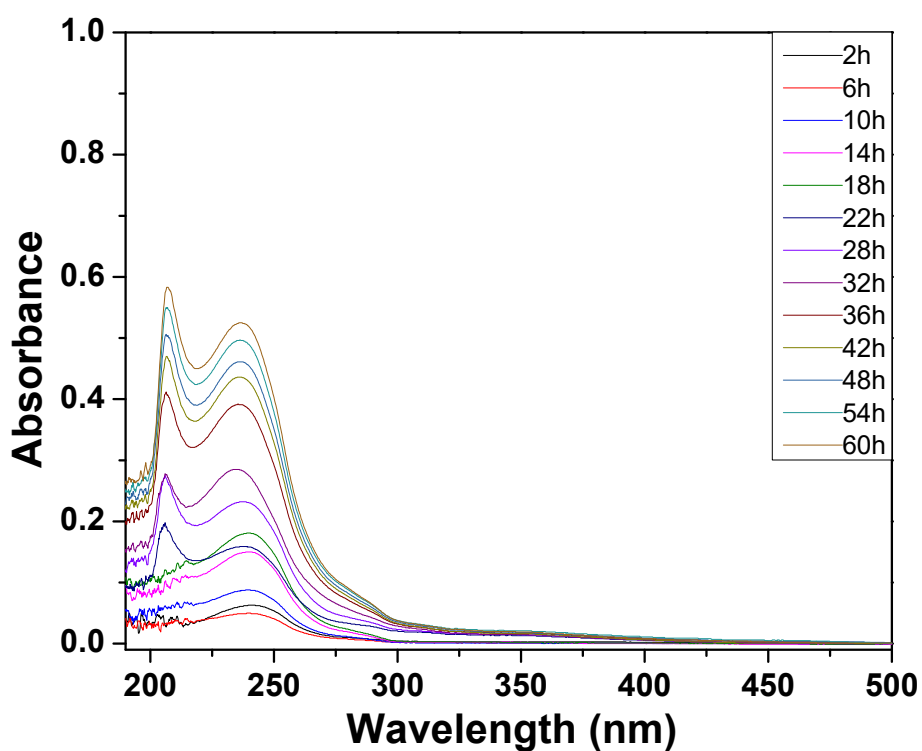

Fig. S21 UV-vis spectra of MIL-53(Fe) release in phosphate buffer of pH 7.4.



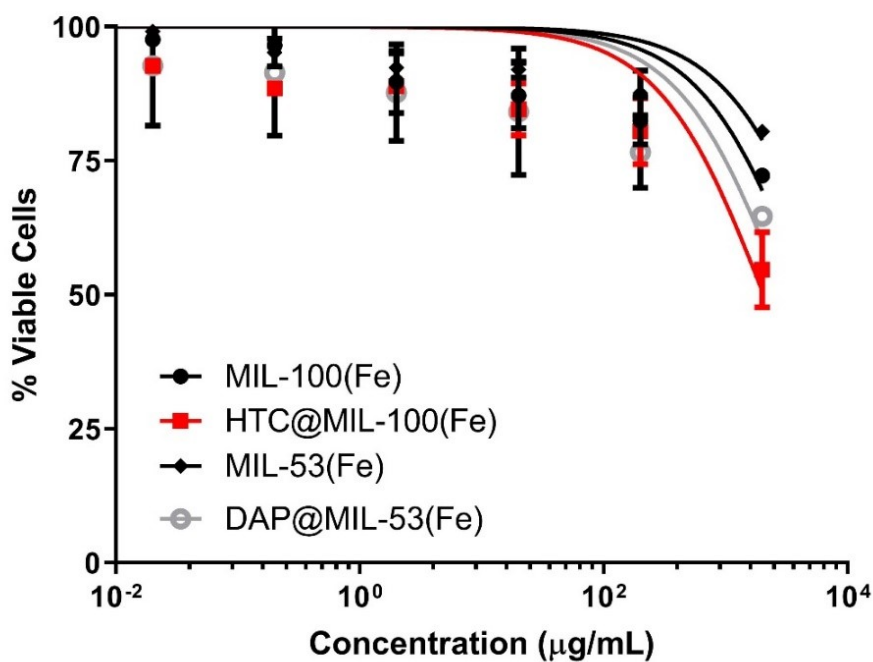

| Samples          | MIL-100(Fe) | HCT@MIL-100(Fe) | MIL-53(Fe) | DAP@MIL-53(Fe) |
|------------------|-------------|-----------------|------------|----------------|
| IC <sub>50</sub> | 4539        | 2051            | 7436       | 2995           |

**Fig. S22** IC<sub>50</sub> values of the test compounds treated to A549 cells.

## References

1. P. I. D. et o. Dideberg, *Acta Cryst.*, 1972, **B28**, 2340.
2. D. E. Braun, H. Krüger, V. Kahlenberg, U. J. Griesser, *Cryst. Growth Des.*, 2017, **17**, 5054.
